# Supplementary material for: Fluorescent silicon nanoparticles inhibit the amyloid fibrillation of insulin
Source: Royal Society of Chemistry journal article supplement (doi:10.1039/c8tb02964d), 2019-01-01
Supplement: c8tb02964d1.pdf [file c8tb02964d1.pdf]

## Supporting Information

### Fluorescent Silicon Nanoparticles Inhibit the Amyloid Fibrillation of Insulin

Yingying Ma,<sup>a</sup> Renliang Huang,<sup>\*,b</sup> Wei Qi,<sup>\*, a, c</sup> Rongxin Su<sup>a c</sup> and Zhimin He<sup>a</sup>

<sup>a</sup> State Key Laboratory of Chemical Engineering, School of Chemical Engineering and Technology, Tianjin University, Tianjin 300072, P. R. China

<sup>b</sup> Tianjin Key Laboratory of Indoor Air Environmental Quality Control, School of Environmental Science and Engineering, Tianjin University, Tianjin 300072, P. R. China

<sup>c</sup> Collaborative Innovation Center of Chemical Science and Engineering (Tianjin), Tianjin Key Laboratory of Membrane Science and Desalination Technology, Tianjin University, Tianjin 300072, P. R. China

---

\* Author to whom any correspondence should be addressed

E-mail: tjuhrl@tju.edu.cn (R. H.), qiwei@tju.edu.cn (W. Q.)

## Supplementary Figures

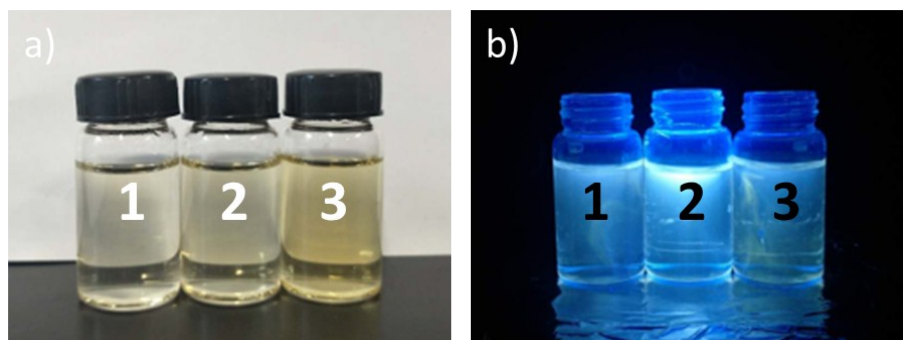

**Fig. S1** Images of SiNPs with a concentration of 10 mg/mL under ambient light (a) and 365 nm UV irradiation (b).

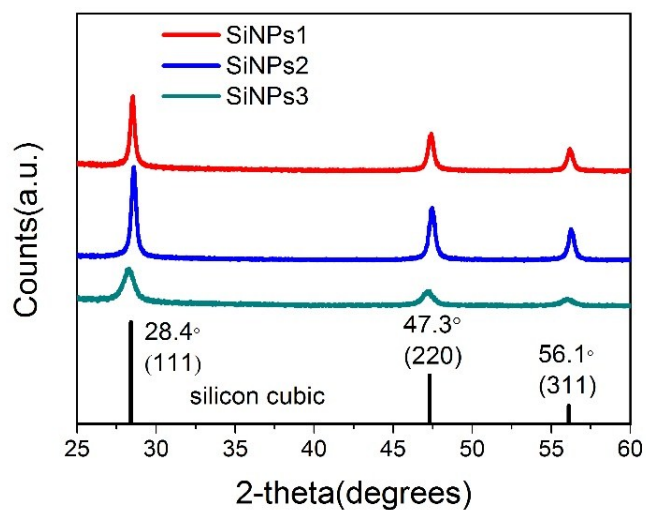

**Fig. S2** XRD patterns of the SiNPs

(The standard diffraction lines of silicon cubic are also shown for comparison)

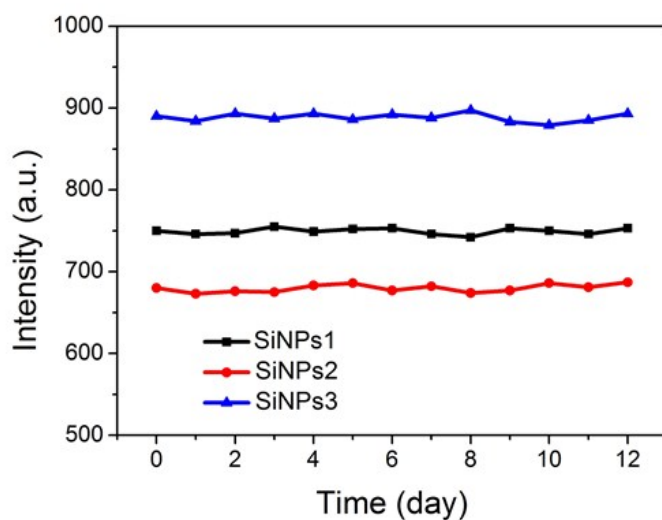

**Fig. S3** The change in fluorescence intensity of SiNPs incubated in 20% acetic acid solution

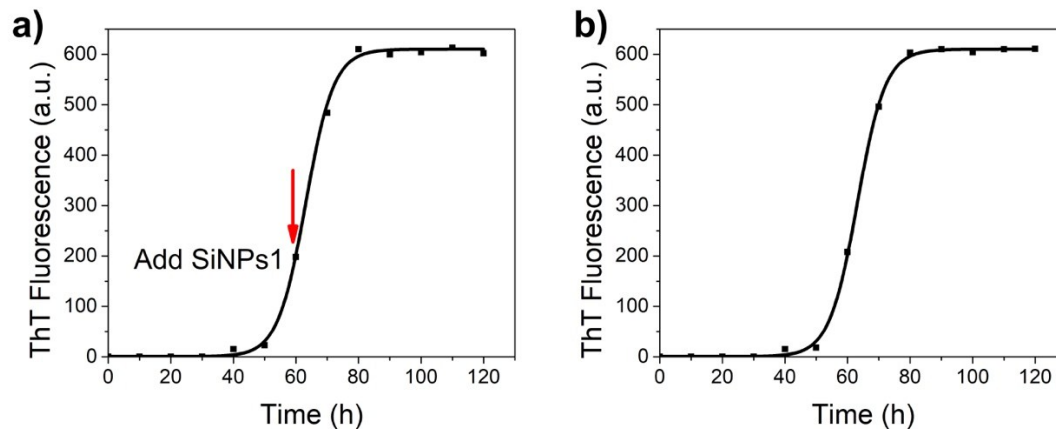

**Fig. S4** ThT fluorescence intensity for insulin aggregation upon addition of 5.0 µg/mL SiNPs (a) and in the absence of SiNPs.

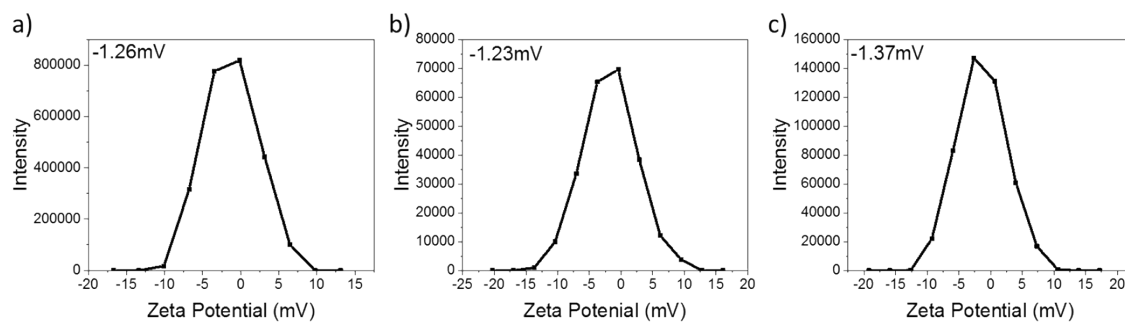

**Fig. S5** Zeta potential values for SiNPs1 (a), 2 (b), and 3 (c) in 20% (v/v) acetic acid solution.

## Supplementary Tables

**Table S1** Effects of SiNPs on the kinetic parameters of insulin fibrillation in 20% (v/v) acetic acid solution. The concentration of insulin of insulin was 2 mg/mL. The fluorescence intensity of insulin alone was set as a reference value.

|                  | Fibril Formation |             |           |               |
|------------------|------------------|-------------|-----------|---------------|
|                  | Lag time (h)     | Growth rate | Intensity | Amyloidogenic |
| Insulin          | 53.3             | 32.7        | 619       | 1             |
| Insulin + SiNPs1 |                  |             |           |               |
| 0.5 µg/mL        | 64.3             | 11.7        | 188       | 0.30          |
| 1.0 µg/mL        | 67.3             | 9.5         | 156       | 0.25          |
| 2.5 µg/mL        | 69.7             | 5.8         | 89        | 0.14          |
| 5.0 µg/mL        | 76.8             | 5.5         | 67        | 0.11          |
| Insulin + SiNPs2 |                  |             |           |               |
| 0.5 µg/mL        | 63.8             | 16.4        | 266       | 0.43          |
| 1.0 µg/mL        | 67.3             | 15.0        | 207       | 0.33          |
| 2.5 µg/mL        | 67.6             | 8.5         | 128       | 0.21          |
| 5.0 µg/mL        | 68.5             | 5.8         | 92        | 0.15          |
| Insulin + SiNPs3 |                  |             |           |               |
| 0.5 µg/mL        | 54.9             | 23.6        | 386       | 0.62          |
| 1.0 µg/mL        | 56.1             | 13.5        | 239       | 0.39          |
| 2.5 µg/mL        | 59.9             | 11.5        | 155       | 0.25          |
| 5.0 µg/mL        | 65.3             | 8.5         | 123       | 0.20          |

**Table S2** Secondary structures contents of insulin in 20% acetic acid solution.

|                  | Secondary Structures |                |           |
|------------------|----------------------|----------------|-----------|
|                  | $\alpha$ -helix      | $\beta$ -sheet | unordered |
| Insulin          | 0.127                | 0.581          | 0.292     |
| Insulin + SiNPs1 |                      |                |           |
| 0.5 $\mu$ g/mL   | 0.305                | 0.287          | 0.408     |
| 1.0 $\mu$ g/mL   | 0.343                | 0.250          | 0.407     |
| 2.5 $\mu$ g/mL   | 0.369                | 0.204          | 0.427     |
| 5.0 $\mu$ g/mL   | 0.414                | 0.150          | 0.436     |
| Insulin + SiNPs2 |                      |                |           |
| 0.5 $\mu$ g/mL   | 0.273                | 0.338          | 0.389     |
| 1.0 $\mu$ g/mL   | 0.292                | 0.302          | 0.406     |
| 2.5 $\mu$ g/mL   | 0.347                | 0.244          | 0.409     |
| 5.0 $\mu$ g/mL   | 0.367                | 0.213          | 0.420     |
| Insulin + SiNPs3 |                      |                |           |
| 0.5 $\mu$ g/mL   | 0.252                | 0.405          | 0.343     |
| 1.0 $\mu$ g/mL   | 0.277                | 0.316          | 0.407     |
| 2.5 $\mu$ g/mL   | 0.333                | 0.254          | 0.413     |
| 5.0 $\mu$ g/mL   | 0.349                | 0.239          | 0.412     |
